# Supplementary material for: Controllable structure reconstruction of nickel–iron compounds toward highly efficient oxygen evolution
Source: Royal Society of Chemistry journal article supplement (doi:10.1039/d0nr02254c), 2020-01-01
Supplement: d0nr02254c1.pdf [file d0nr02254c1.pdf]

## Supporting Information

### **Controllable Structure Reconstruction of Nickel-Iron Compounds toward Highly Efficient Oxygen Evolution**

Azhar Mahmood<sup>†</sup>, Qiangmin Yu<sup>†</sup>, Yuting Luo, Zhiyuan Zhang, Chi Zhang, Ling Qiu and Bilu Liu\*

Shenzhen Geim Graphene Center (SGC), Tsinghua-Berkeley Shenzhen Institute (TBSI) and Tsinghua Shenzhen International Graduate School (TSIGS), Tsinghua University, Shenzhen 518055, PR China.

Author contributions

<sup>†</sup>A.M. and Q.Y. contributed equally to this work.

Corresponding author

Bilu Liu. Email: [bilu.liu@sz.tsinghua.edu.cn](mailto:bilu.liu@sz.tsinghua.edu.cn)

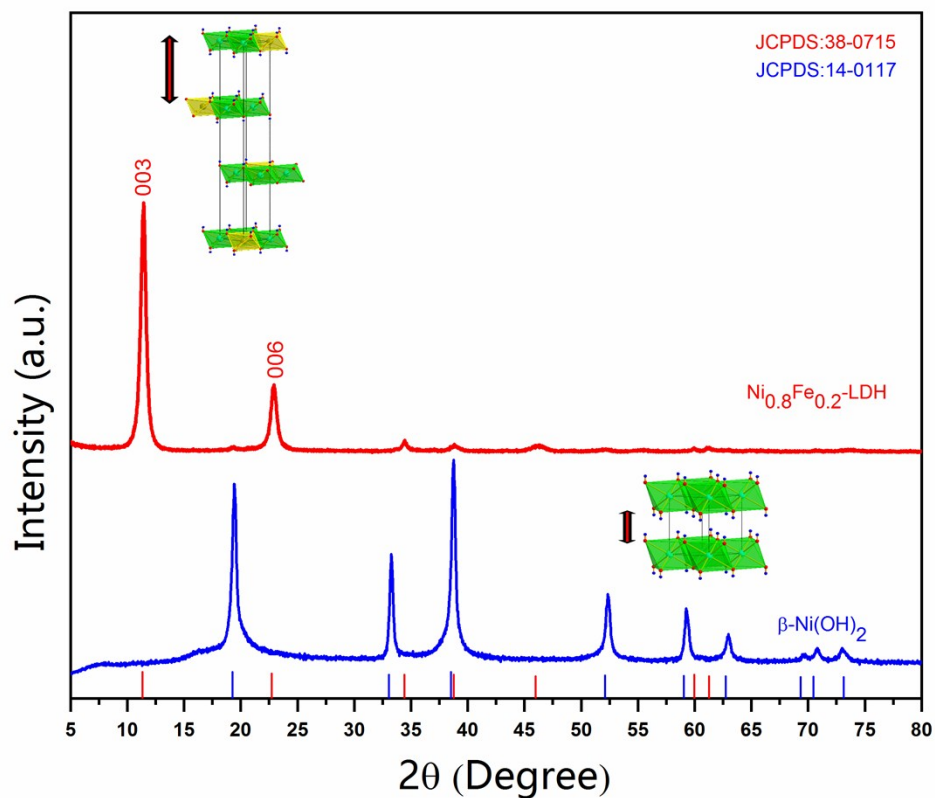

**Figure S1.** XRD patterns and schematic crystal structures of  $\beta\text{-Ni(OH)}_2$  and  $\text{Ni}_{0.8}\text{Fe}_{0.2}\text{-LDH}$ . The broad diffraction peaks at  $11.22^\circ$  and  $23.7^\circ$ , corresponding to the (003) and (006) lattice planes associated with the interlayer spacing of the  $\text{Ni}_{0.8}\text{Fe}_{0.2}\text{-LDH}$ .<sup>1</sup> The peak positions and sharpness of the reflections confirm the formation of LDH phase with large interlayer space compared to that of  $\beta\text{-Ni(OH)}_2$ .

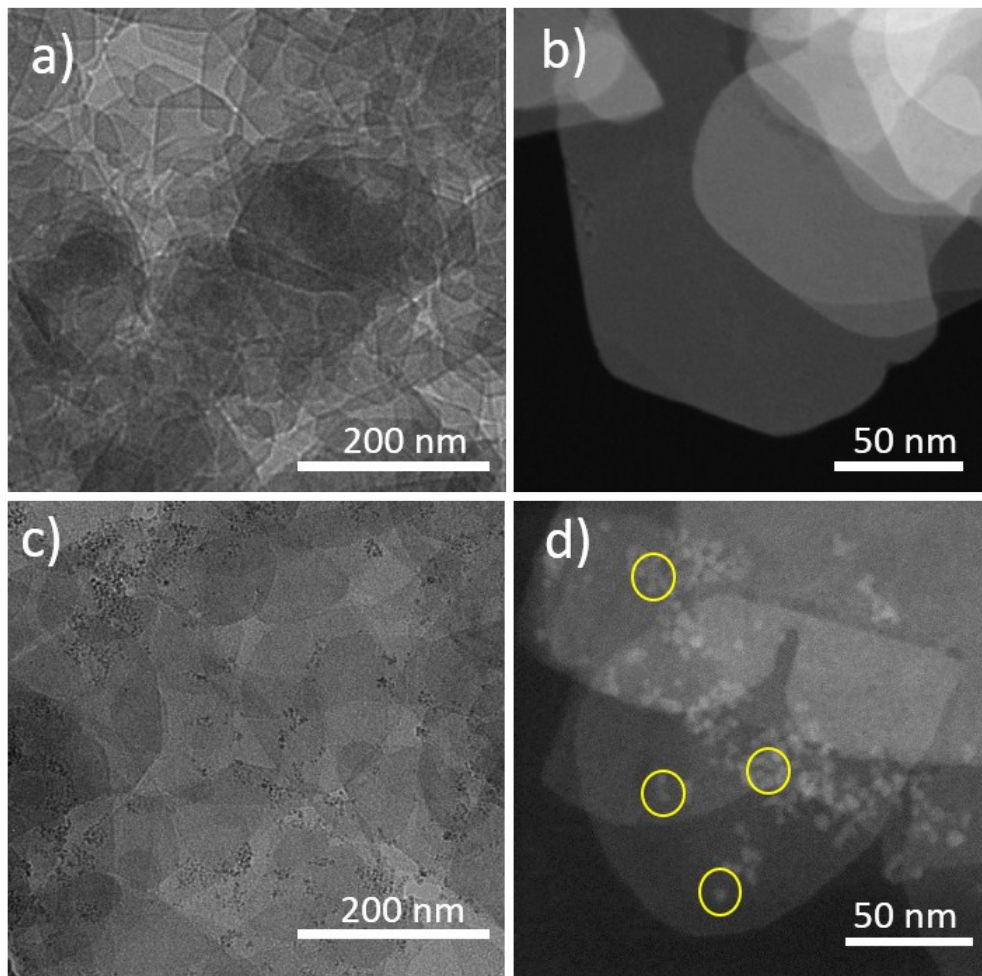

**Figure S2.** a) TEM, (b) HAADF-STEM of Ni<sub>0.8</sub>Fe<sub>0.2</sub>-LDH with lower ratio of Fe. (c) TEM, (d) HAADF-STEM of Ni<sub>0.7</sub>Fe<sub>0.3</sub>-LDH with higher ratio of Fe. HAADF-STEM images clearly show that slight increase of Fe-precursor, causes iron redundant phase nanoparticles.

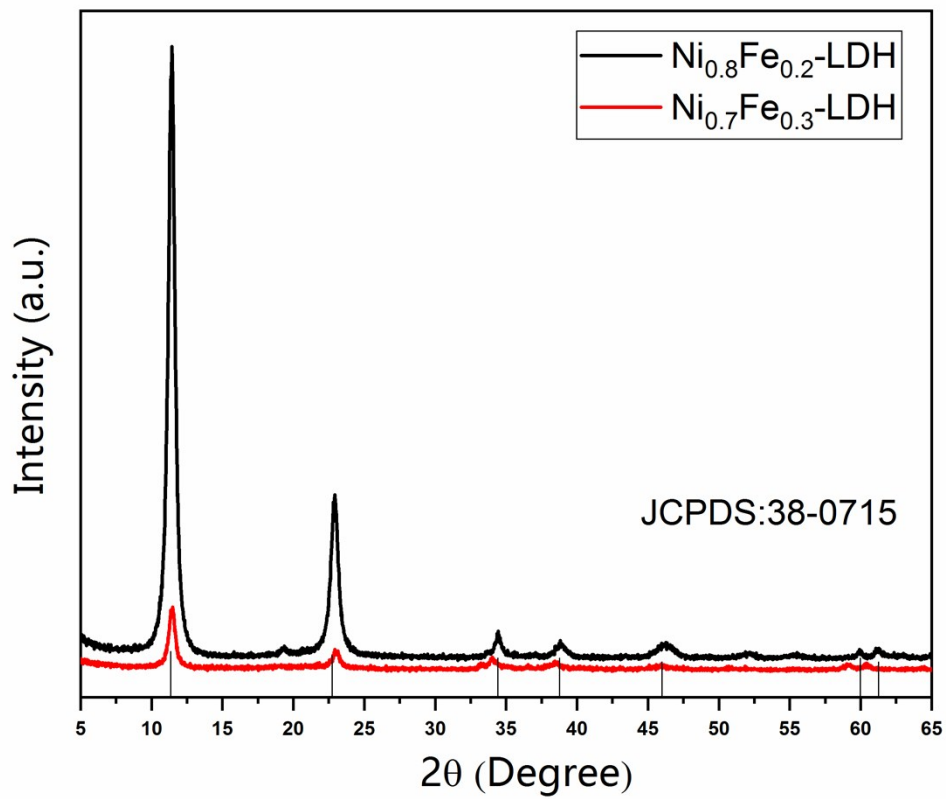

**Figure S3.** Comparison of XRD patterns of  $\text{Ni}_{0.8}\text{Fe}_{0.2}\text{-LDH}$  and  $\text{Ni}_{0.7}\text{Fe}_{0.3}\text{-LDH}$  synthesized under the similar experimental conditions with slight difference of iron precursor. Pattern of  $\text{Ni}_{0.7}\text{Fe}_{0.3}\text{-LDH}$  clearly showing that, slight enhancement of Fe has no obvious effect on the crystal structure of LDH.

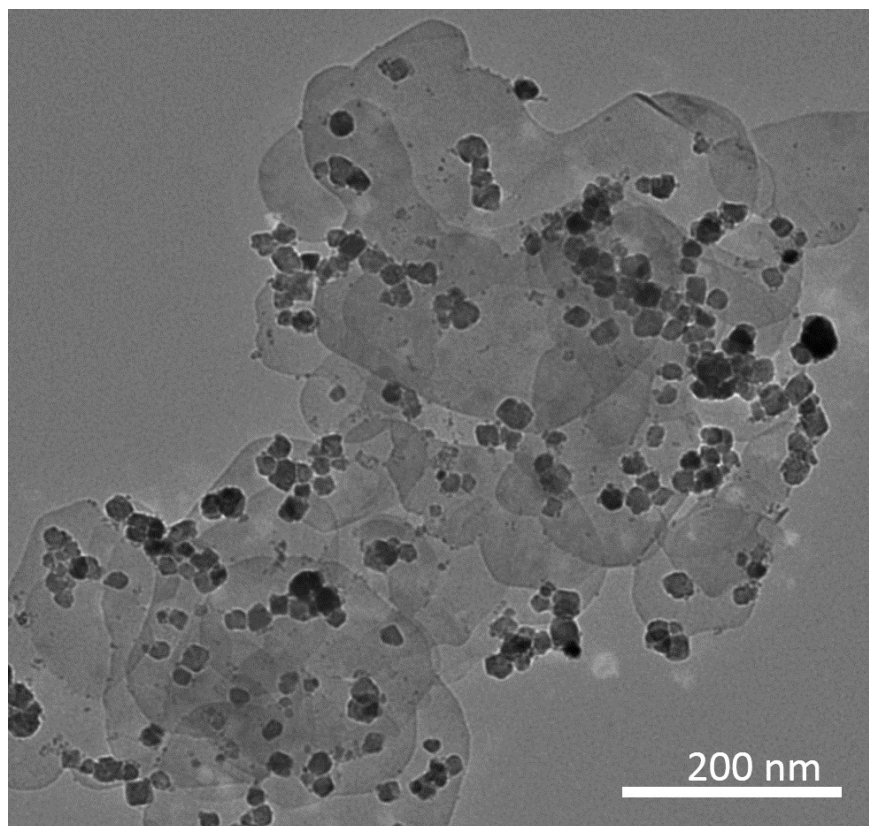

**Figure S4.** TEM image of the  $\text{Ni}_{0.5}\text{Fe}_{0.5}\text{-LDH}$  with equal ratio of Ni and Fe precursors collected at 150 °C after 48 h. TEM image of  $\text{Ni}_{0.5}\text{Fe}_{0.5}\text{-LDH}$  showing that at equal ratio of precursors  $\text{NiFe}_2\text{O}_4$  nanograins appears on the entire surface of  $\text{Ni}_{0.5}\text{Fe}_{0.5}\text{-LDH}$  nanosheets. These  $\text{NiFe}_2\text{O}_4$  nanoparticles may block the active sites of NiFe-LDH phase and leads to the low OER activity.

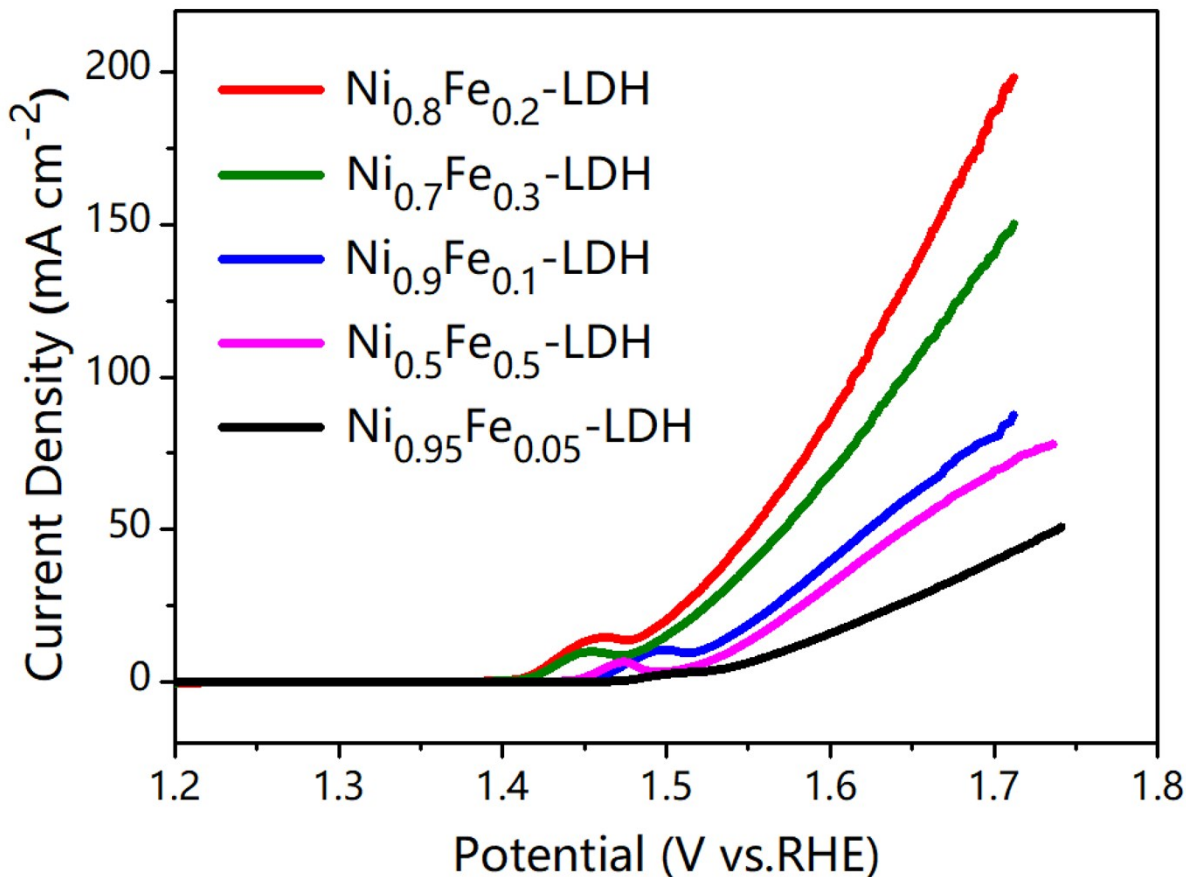

**Figure S5.** OER polarization curves of NiFe-LDH catalysts with different Fe contents.

The linear sweep voltammograms of NiFe-LDH catalysts synthesized with different molar ratio of precursors showing that OER performance of Ni<sub>0.95</sub>Fe<sub>0.05</sub>-LDH, Ni<sub>0.9</sub>Fe<sub>0.1</sub>-LDH and Ni<sub>0.8</sub>Fe<sub>0.2</sub>-LDH gradually increases with the increase of Fe content. While, OER activity of Ni<sub>0.7</sub>Fe<sub>0.3</sub>-LDH and Ni<sub>0.5</sub>Fe<sub>0.5</sub>-LDH decreases with further increase of Fe contents. This decrease in OER performance is due to the formation of redundant phases of FeO<sub>x</sub> on the surface of LDH, which are electrochemically inert for the OER and hinder the exposure of the active sites on the surface of LDH nanosheets.

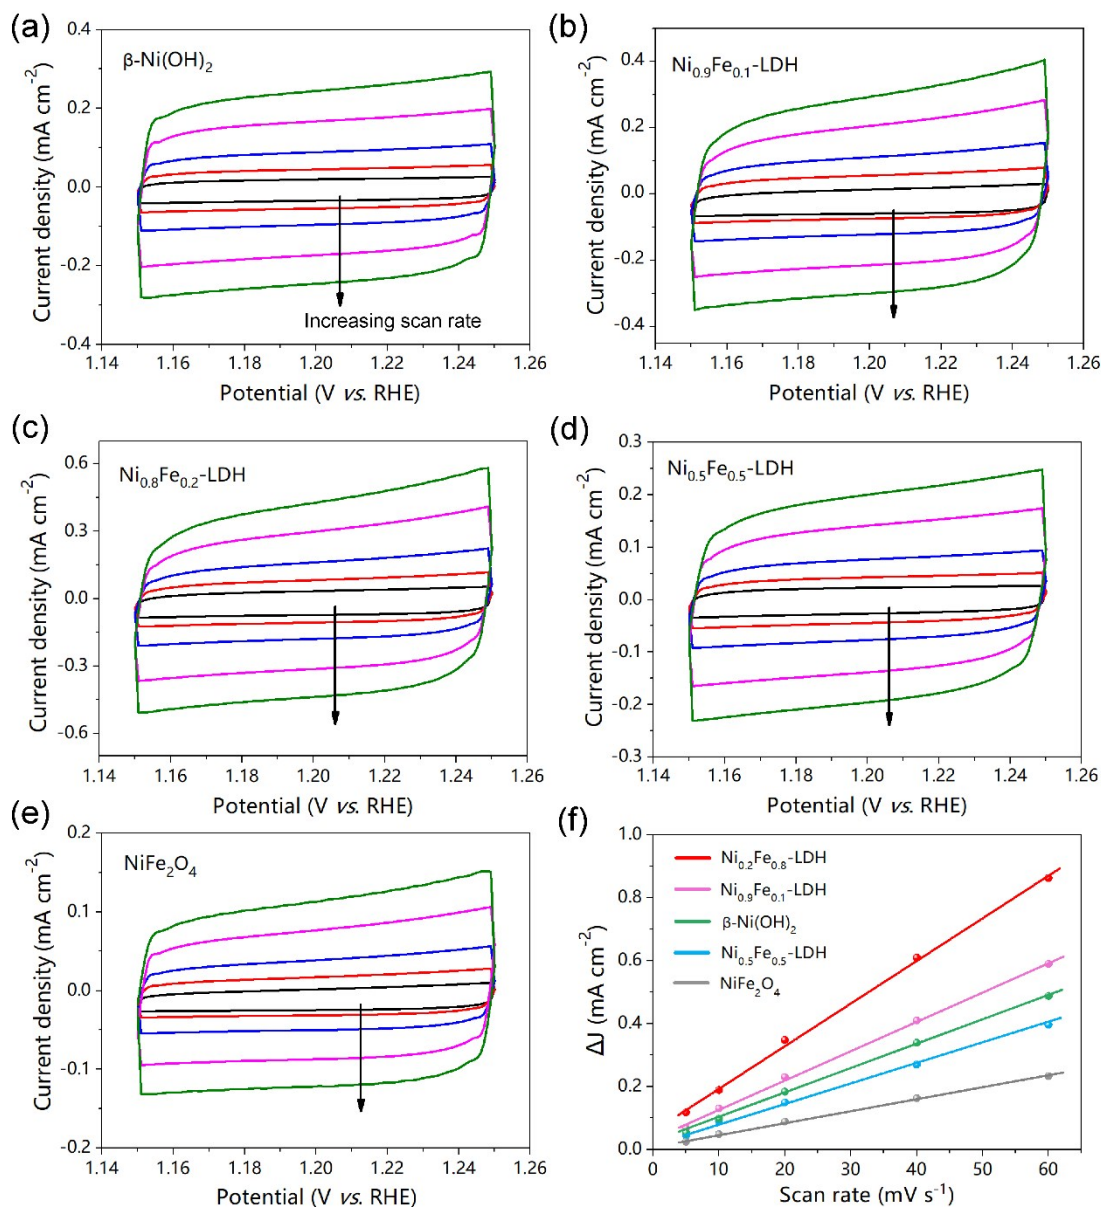

**Figure S6.** CV scans of different samples measured at a non-Faradaic region range from 1.15 to 1.25 V, with various potential scan rates (5-60 mV s<sup>-1</sup>). (a)  $\beta$ -Ni(OH)<sub>2</sub>. (b) Ni<sub>0.9</sub>Fe<sub>0.1</sub>-LDH. (c) Ni<sub>0.8</sub>Fe<sub>0.2</sub>-LDH. (d) Ni<sub>0.5</sub>Fe<sub>0.5</sub>-LDH. (e) NiFe<sub>2</sub>O<sub>4</sub>. (f) A capacitive currents ( $J_a - J_c$ ) at 1.2 V against the scan rate, where the slope of the fitted line was used to calculate the electrochemical double layer capacitance ( $C_{dl}$ ).

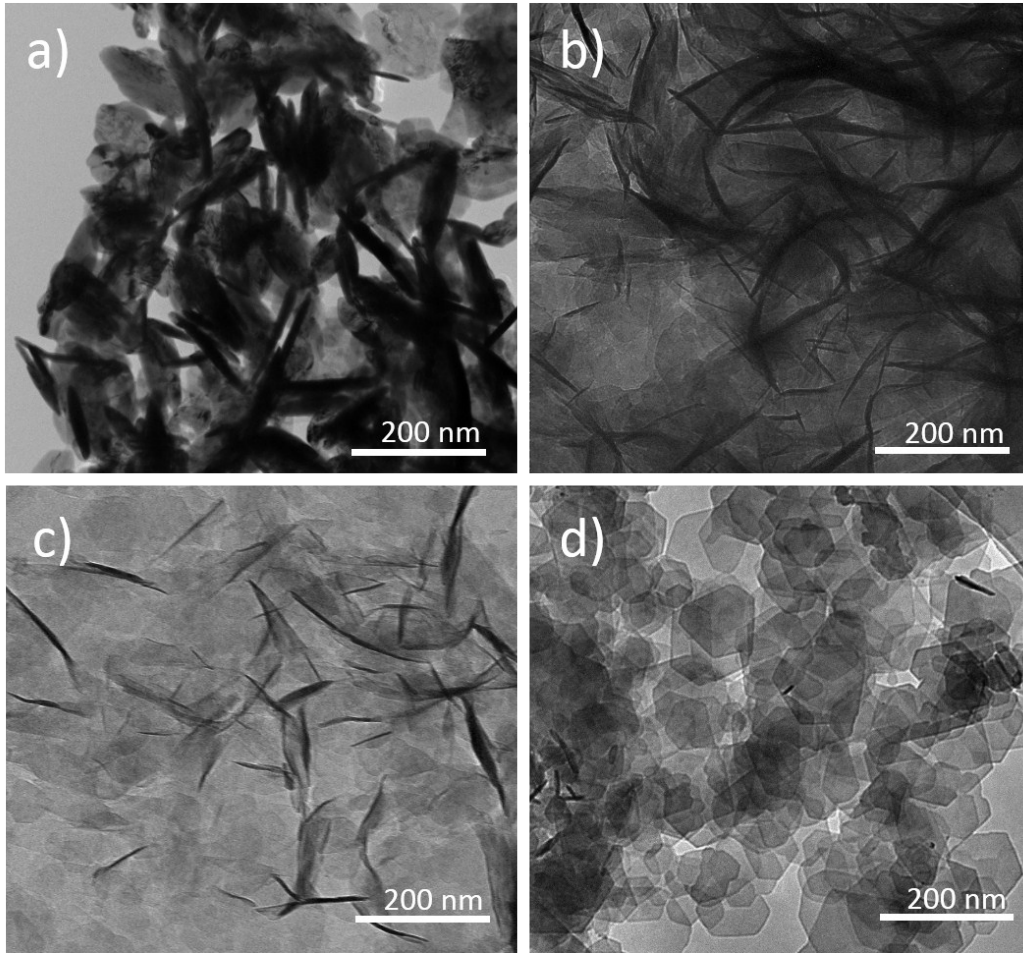

**Figure S7.** TEM images of the (a)  $\beta$ -Ni(OH)<sub>2</sub>, (b) Ni<sub>0.95</sub>Fe<sub>0.05</sub>-LDH, (c) Ni<sub>0.9</sub>Fe<sub>0.1</sub>-LDH and (d) Ni<sub>0.8</sub>Fe<sub>0.2</sub>-LDH collected at 150 °C after 48 h. TEM images shows that aggregated shape changes into well-defined hexagonal shape after the doping of iron.



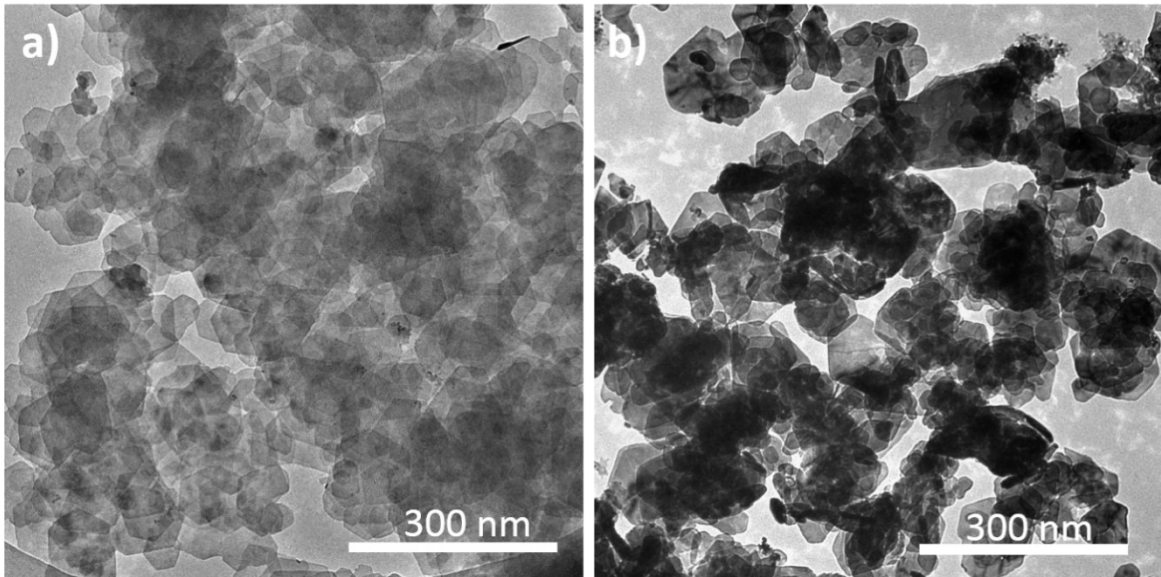

**Figure S8.** TEM images of the  $\text{Ni}_{0.8}\text{Fe}_{0.2}$ -LDH nanosheets (a) before stability test and (b) after stability test. No obvious change in morphology observed after OER catalysis.

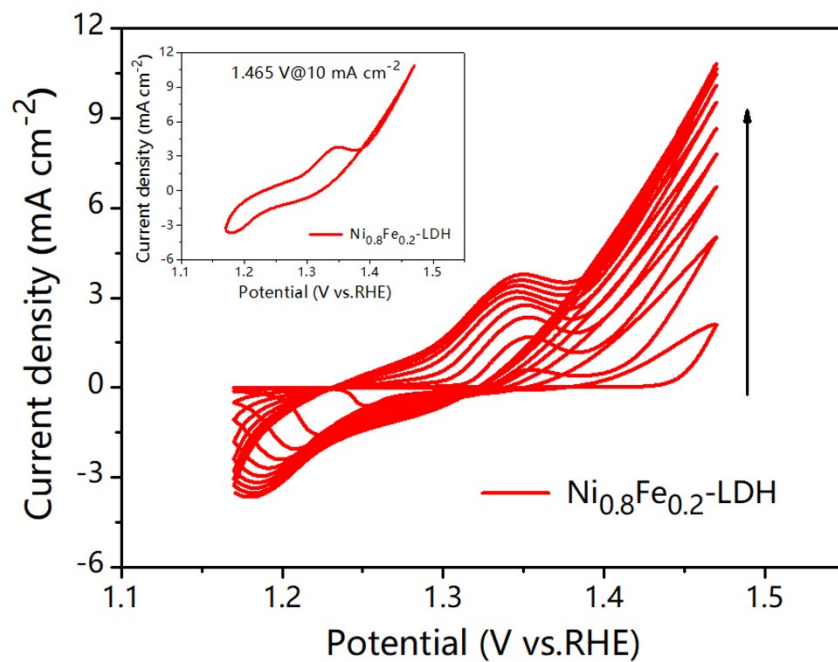

**Figure S9.** 20 cycles of  $\text{Ni}_{0.8}\text{Fe}_{0.2}$ -LDH catalyst in 1M KOH. Cycles show the obvious increasing trends of OER performance, the inset shows the current density of 20<sup>th</sup> cycle.

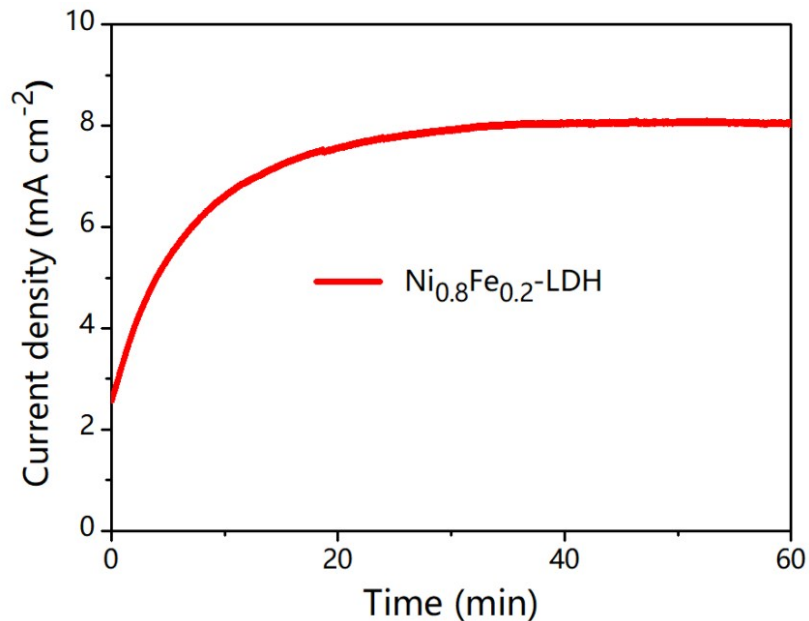

**Figure S10.** Time-dependent current density curve of fresh  $\text{Ni}_{0.8}\text{Fe}_{0.2}\text{-LDH}$  at the potential of 1.45 V vs. RHE.

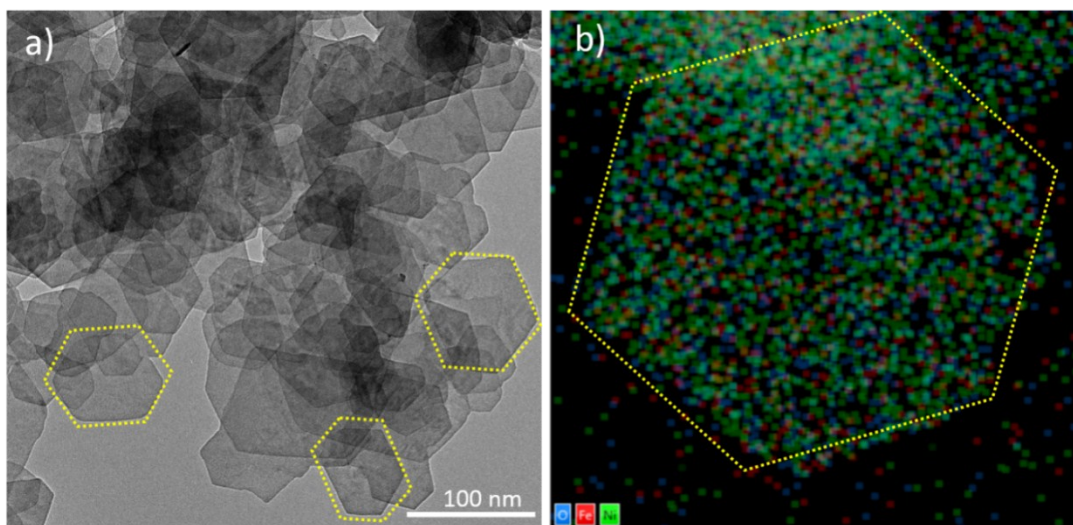

**Figure S11.** (a) TEM image of the  $\text{Ni}_{0.8}\text{Fe}_{0.2}\text{-LDH}$  nanosheets (b) HAADF-STEM image of single  $\text{Ni}_{0.8}\text{Fe}_{0.2}\text{-LDH}$  nanosheet with uniform distribution of elements. A high number of overall edge sites (yellow lines) of hexagonal sheets are expected to have open coordination sites that might be the active sites for OER.

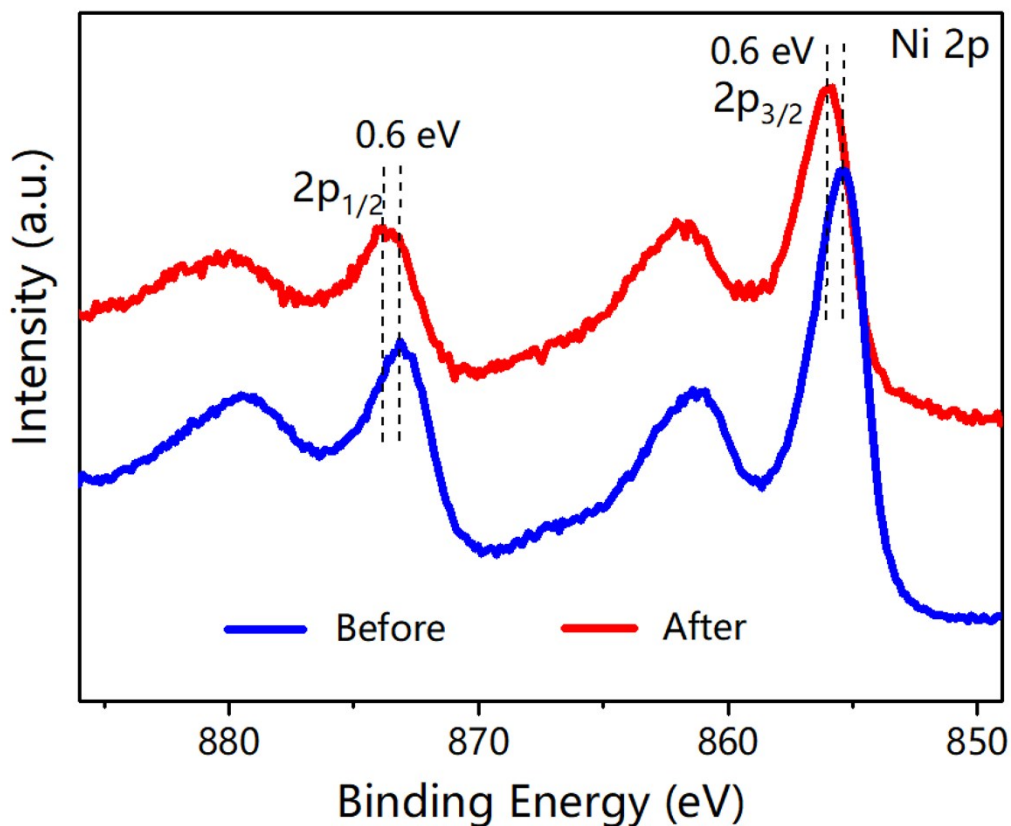

**Figure S12.** XPS spectra of the as-prepared Ni<sub>0.8</sub>Fe<sub>0.2</sub>-LDH nanosheets (a) before and (b) after stability test. X-ray photoelectron spectroscopy results of Ni<sub>0.8</sub>Fe<sub>0.2</sub>-LDH before and after stability test showing that, there is a positive shift of 0.6 eV for Ni(III) in Ni<sub>0.8</sub>Fe<sub>0.2</sub>-LDH after OER process. This shifting of peak implying that Ni<sub>0.8</sub>Fe<sub>0.2</sub>-LDH dynamically reform (Ni<sup>2+</sup> → Ni<sup>3+</sup>) the active phase of the surface layer during OER.

**Table S1.** Fe : Ni ratios in the NiFe-LDHs samples and spinel structure determined by ICP.

| Sample name                                | Percentage ratios of (Ni : Fe) in the final samples determined by ICP |
|--------------------------------------------|-----------------------------------------------------------------------|
| Ni <sub>0.95</sub> Fe <sub>0.05</sub> -LDH | 0.95:0.05                                                             |
| Ni <sub>0.9</sub> Fe <sub>0.1</sub> -LDH   | 0.9:0.1                                                               |
| Ni <sub>0.8</sub> Fe <sub>0.2</sub> -LDH   | 0.8:0.2                                                               |
| Ni <sub>0.7</sub> Fe <sub>0.3</sub> -LDH   | 0.7:0.3                                                               |
| Ni <sub>0.5</sub> Fe <sub>0.5</sub> -LDH   | 0.5:0.5                                                               |
| NiFe <sub>2</sub> O <sub>4</sub>           | 0.3:0.7                                                               |

**Table S2.** OER activities of some benchmark catalysts in alkaline solution.

| Catalyst                                                | substrate | $\eta(\text{V})@10\text{mA}$<br>$\text{cm}^{-2}$ | Tafel slope | References |
|---------------------------------------------------------|-----------|--------------------------------------------------|-------------|------------|
| Ni-Fe LDH hollow nanoprisms                             | GC        | 280                                              | 49.4        | 2          |
| NiFe-LDH                                                | GC        | 302                                              | 40          | 3          |
| Ni <sub>0.83</sub> Fe <sub>0.17</sub> (OH) <sub>2</sub> | GC        | 245                                              | 61          | 4          |
| NiFe-LDH                                                | GC        | 280                                              | 47.6        | 5          |
| Ni <sub>2/3</sub> -Fe <sub>1/3</sub> LDH                | GC        | 310                                              | 76          | 6          |
| Fe <sub>(0.5)</sub> doped $\beta$ -Ni(OH) <sub>2</sub>  | GC        | 260                                              | 32          | 7          |
| NiFe LDH                                                | GC        | 270                                              | 89          | 8          |
| NiFe LDH                                                | GC        | 240                                              | 38.9        | 9          |
| NiFe/3D-ErGO                                            | Au        | 259                                              | 33          | 10         |
| n-NiFe LDH/NGF                                          | GC        | 337                                              | 45          | 11         |
| Ni-Fe-LDH-MoS <sub>2</sub>                              | GC        | 250                                              | 45          | 12         |
| NiFe-LDH                                                | CP        | 322                                              | 144         | 13         |

|                                                                                     |           |            |           |                  |
|-------------------------------------------------------------------------------------|-----------|------------|-----------|------------------|
| NiFe-LDH                                                                            | GC        | 263        | 60        | 14               |
| Ni <sub>0.8</sub> Co <sub>0.1</sub> Fe <sub>0.1</sub> O <sub>x</sub> H <sub>y</sub> | Ni Foam   | 239        | 45.4      | 15               |
| NiV-LDHs                                                                            | Ni Foam   | 257        | 54        | 16               |
| Ni <sub>3</sub> FeAl <sub>0.91</sub> -LDH                                           | Ni Foam   | 320        | 50        | 17               |
| Ni <sub>3</sub> FeN-NPs                                                             | GC        | 280        | 46        | 18               |
| <b>Ni<sub>0.8</sub>Fe<sub>0.2</sub>-LDH</b>                                         | <b>GC</b> | <b>235</b> | <b>41</b> | <b>This work</b> |

## References

1. L. Trotochaud, S. L. Young, J. K. Ranney and S. W. Boettcher, *J. Am. Chem. Soc.*, 2014, **136**, 6744.
2. L. Yu, J. F. Yang, B. Y. Guan, Y. Lu and X. W. D. Lou, *Angew. Chem. Int. Ed. Engl.*, 2018, **57**, 172.
3. F. Song and X. Hu, *Nat. Commun.*, 2014, **5**, 4477.
4. Q. Zhou, Y. Chen, G. Zhao, Y. Lin, Z. Yu, X. Xu, X. Wang, H. K. Liu, W. Sun and S. X. Dou, *ACS Catal.*, 2018, **8**, 5382.
5. L. Trotochaud, S. L. Young, J. K. Ranney and S. W. Boettcher, *J. Am. Chem. Soc.*, 2014, **136**, 6744.
6. W. Ma, R. Ma, C. Wang, J. Liang, X. Liu, K. Zhou and T. Sasaki, *ACS Nano*, 2015, **9**, 1977.
7. K. Zhu, H. Liu, M. Li, X. Li, J. Wang, X. Zhu and W. Yang, *J. Mater. Chem. A*, 2017, **5**, 7753.
8. Y. Jia, L. Zhang, G. Gao, H. Chen, B. Wang, J. Zhou, M. T. Soo, M. Hong, X. Yan, G. Qian, J. Zou, A. Du and X. Yao, *Adv. Mater.*, 2017, **29**, 1700017.
9. W. Zhang, Y. Wu, J. Qi, M. Chen and R. Cao, *Adv. Energy Mater.*, 2017, **7**.1602547.
10. X. Yu, M. Zhang, W. Yuan and G. Shi, *J. Mater. Chem. A*, 2015, **3**, 6921.
11. C. Tang, H. S. Wang, H. F. Wang, Q. Zhang, G. L. Tian, J. Q. Nie and F. Wei, *Adv. Mater.*, 2015, **27**, 4516.
12. M. S. Islam, M. Kim, X. Jin, S. M. Oh, N.-S. Lee, H. Kim and S.-J. Hwang, *ACS Energy Letter*, 2018, **3**, 952.
13. Y. Yang, L. Dang, M. J. Shearer, H. Sheng, W. Li, J. Chen, P. Xiao, Y. Zhang, R. J. Hamers and S. Jin, *Adv. Energy Mater.*, 2018, **8**, 1703189.
14. J. Zhang, J. Liu, L. Xi, Y. Yu, N. Chen, S. Sun, W. Wang, K. M. Lange and B. Zhang, *J. Am. Chem. Soc.*, 2018, **140**, 3876.
15. Q. Zhao, J. Yang, M. Liu, R. Wang, G. Zhang, H. Wang, H. Tang, C. Liu, Z. Mei, H. Chen and F. Pan, *ACS Catal.*, 2018, **8**, 5621.
16. K. N. Dinh, P. Zheng, Z. Dai, Y. Zhang, R. Dangol, Y. Zheng, B. Li, Y. Zong and Q. Yan, *Small*, 2018, **14**. 1703257.

17. H. Liu, Y. Wang, X. Lu, Y. Hu, G. Zhu, R. Chen, L. Ma, H. Zhu, Z. Tie, J. Liu and Z. Jin, *Nano Energy*, 2017, **35**, 350.
18. X. Jia, Y. Zhao, G. Chen, L. Shang, R. Shi, X. Kang, G. I. N. Waterhouse, L.-Z. Wu, C.-H. Tung and T. Zhang, *Adv. Energy Mater.*, 2016, **6**, 1502585.
